# Supplementary material for: Hg(ii) supramolecular isomers: structural transformation and photoluminescence change
Source: Royal Society of Chemistry journal article supplement (doi:10.1039/c5ce01098e), 2015-01-01

**Electronic supplementary information (ESI)**

**Hg(II) supramolecular isomers:  
structural transformation and photoluminescence change**

Kedar Bahadur Thapa, Yi-Fen Hsu, Hsuan-Chou Lin and Jhy-Der Chen\*  
*Department of Chemistry, Chung-Yuan Christian University, Chung-Li,  
Taiwan, R.O.C.*

**Fig. S1** (a) A drawing showing the N–H---O interactions in **1**. (b) A drawing showing the shortest  $\pi$ - $\pi$  contact.

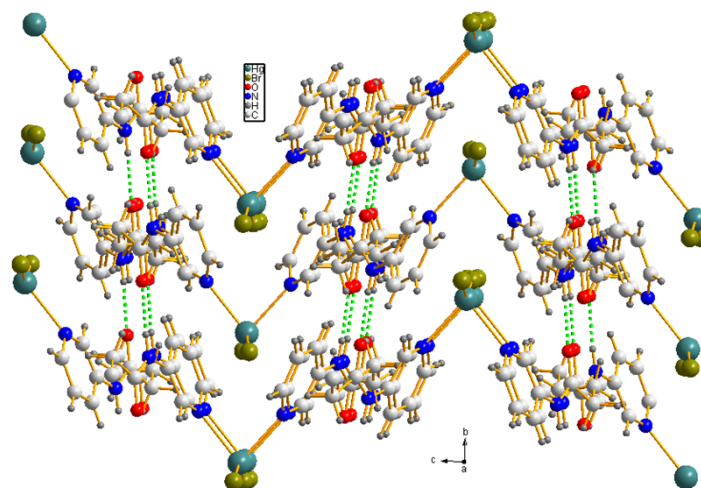

**(a)**

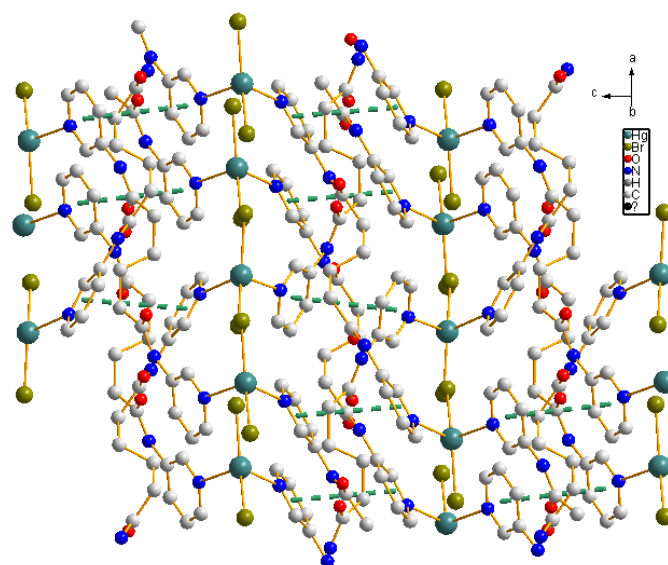

**(b)**

**Fig. S2** (a) A drawing showing the N–H---O interactions in **2**. (b) A drawing showing the shortest  $\pi$ - $\pi$  contact.

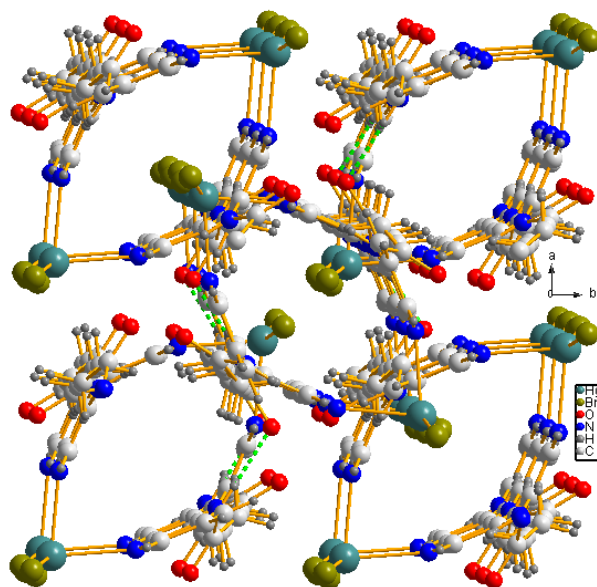

**(a)**

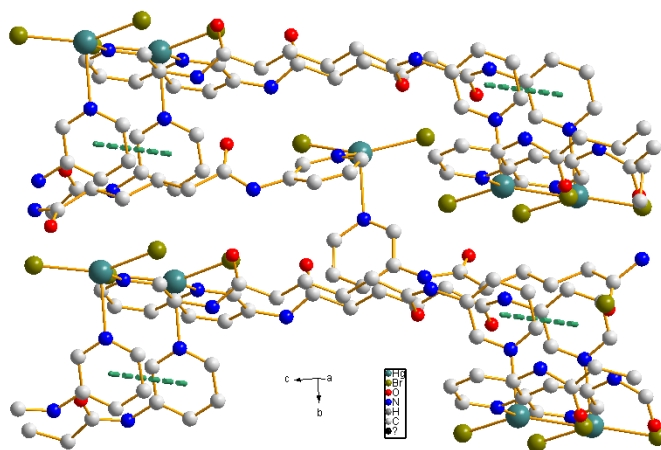

**(b)**

**Fig. S3** (a) A drawing showing the N–H---O interactions in **3**. (b) A drawing showing the shortest  $\pi$ - $\pi$  contact.

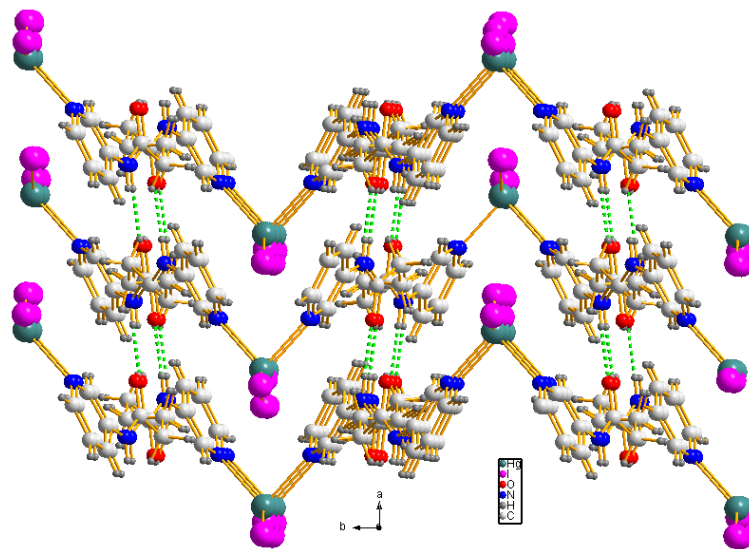

**(a)**

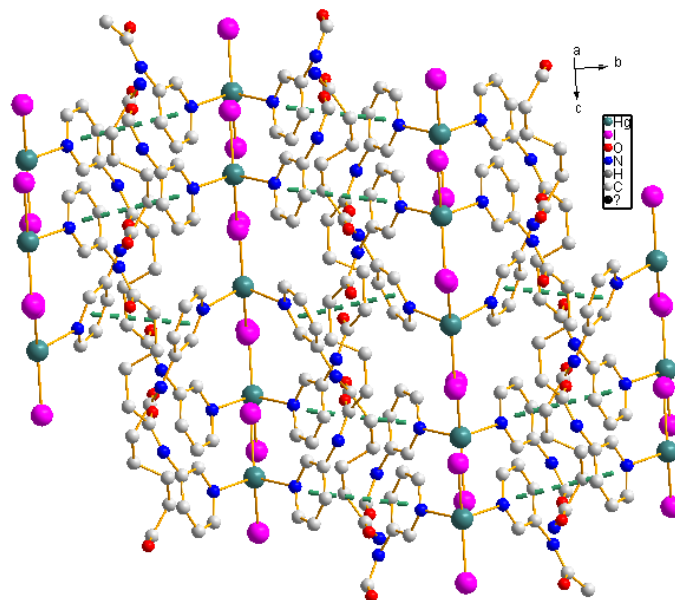

**(b)**

**Fig. S4** (a) A drawing showing the N–H---O interactions in **4**. (b) A drawing showing the shortest  $\pi$ - $\pi$  contact.

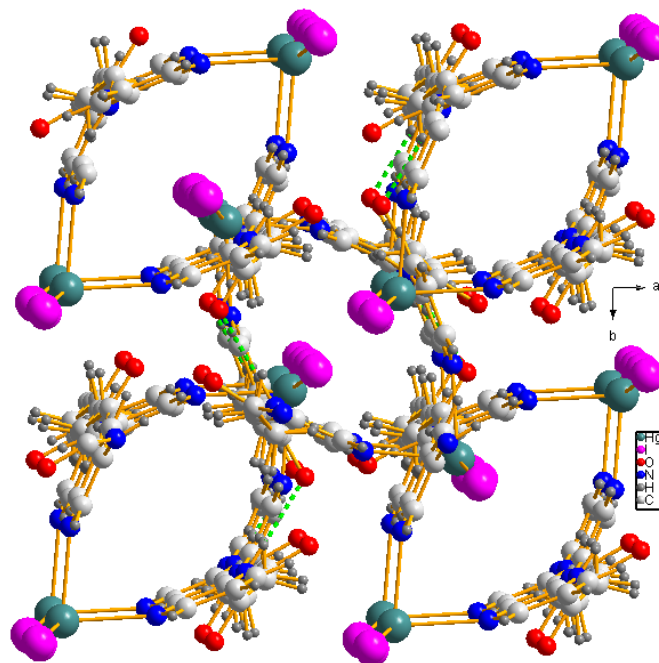

**(a)**

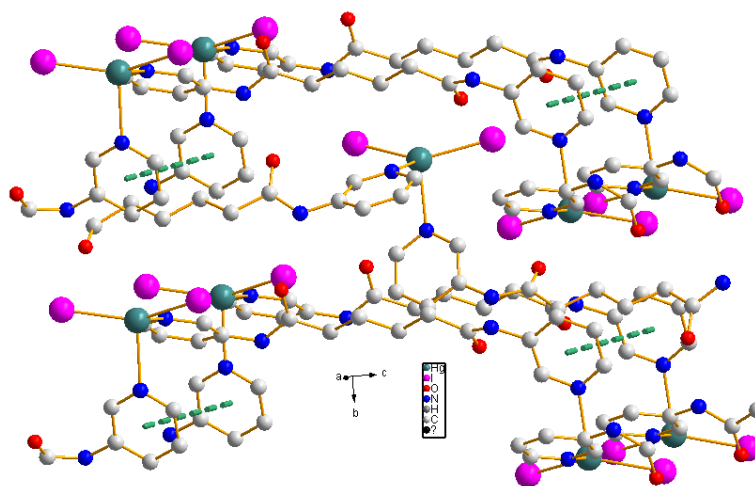

**(b)**

**Fig. S5** Simulated and experimental powder X-ray patterns for **1**.

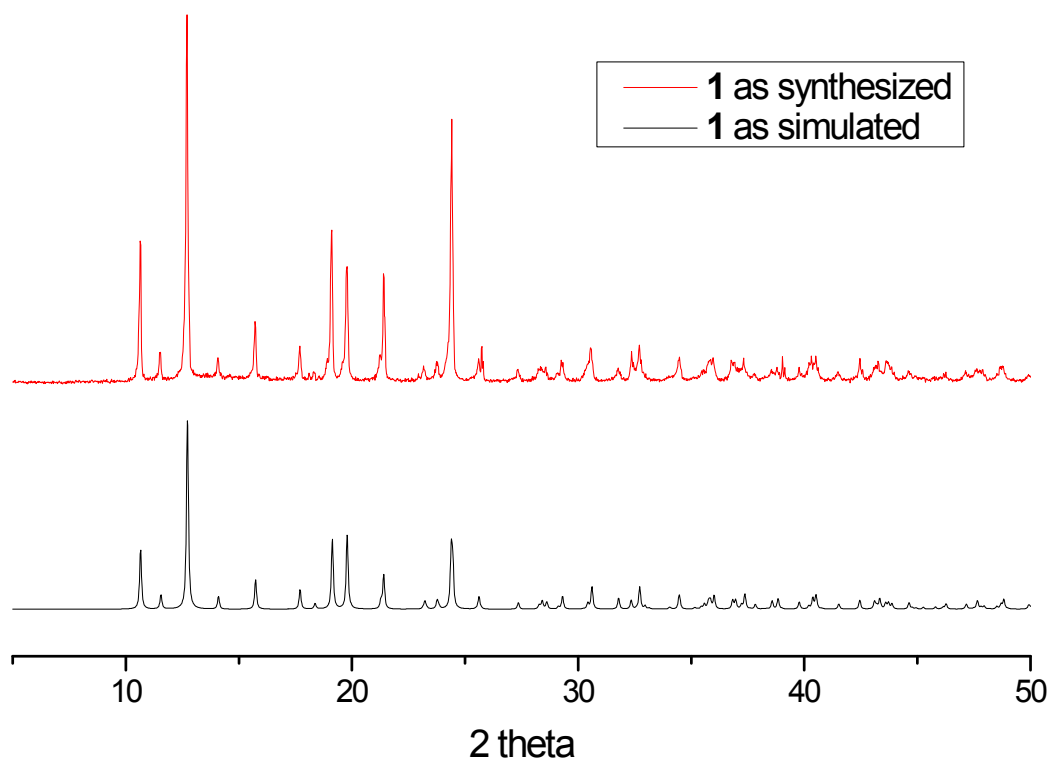

**Fig. S6** Simulated and experimental powder X-ray patterns for **2**.

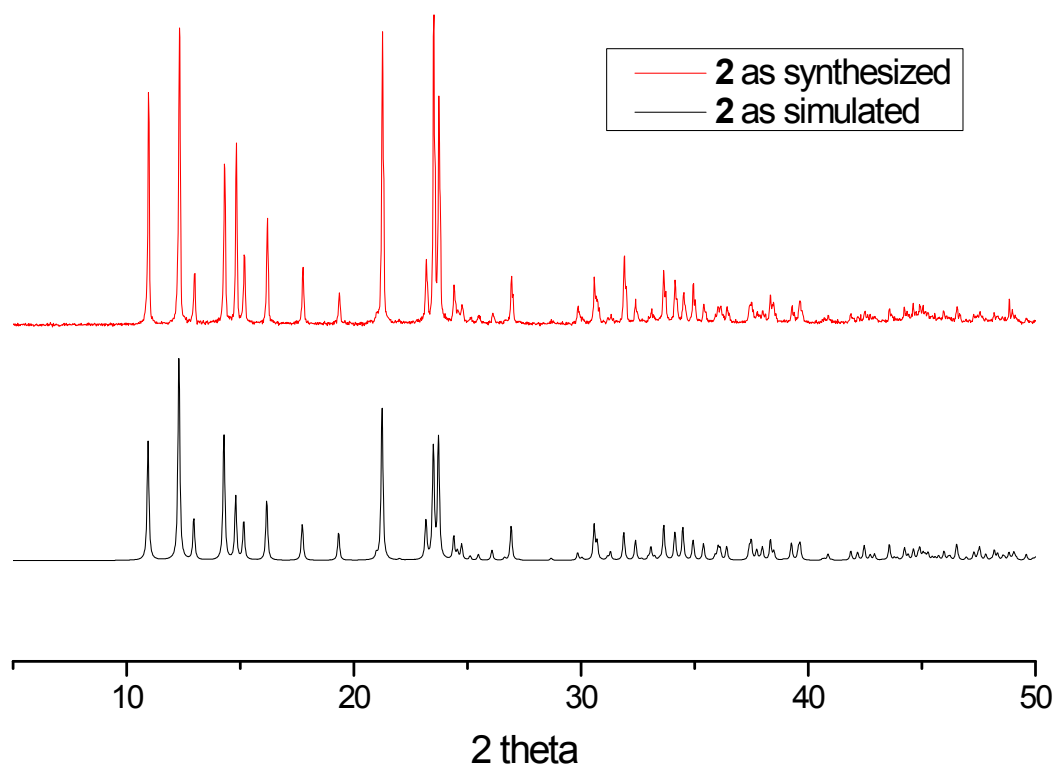

**Fig. S7** Simulated and experimental powder X-ray patterns for **1** (alternate method).

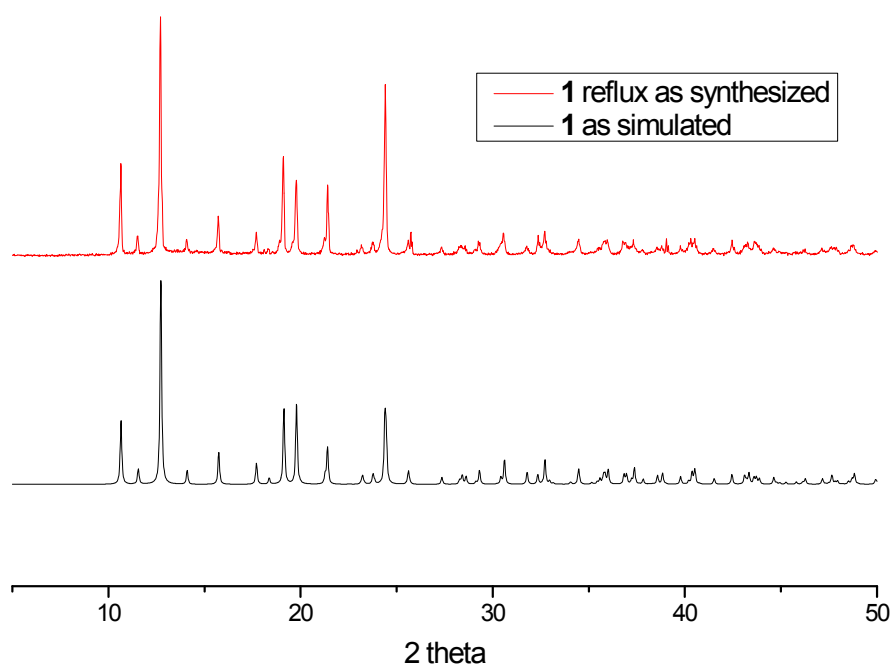



**Fig. S8** Simulated and experimental powder X-ray patterns for **2** (alternate method).

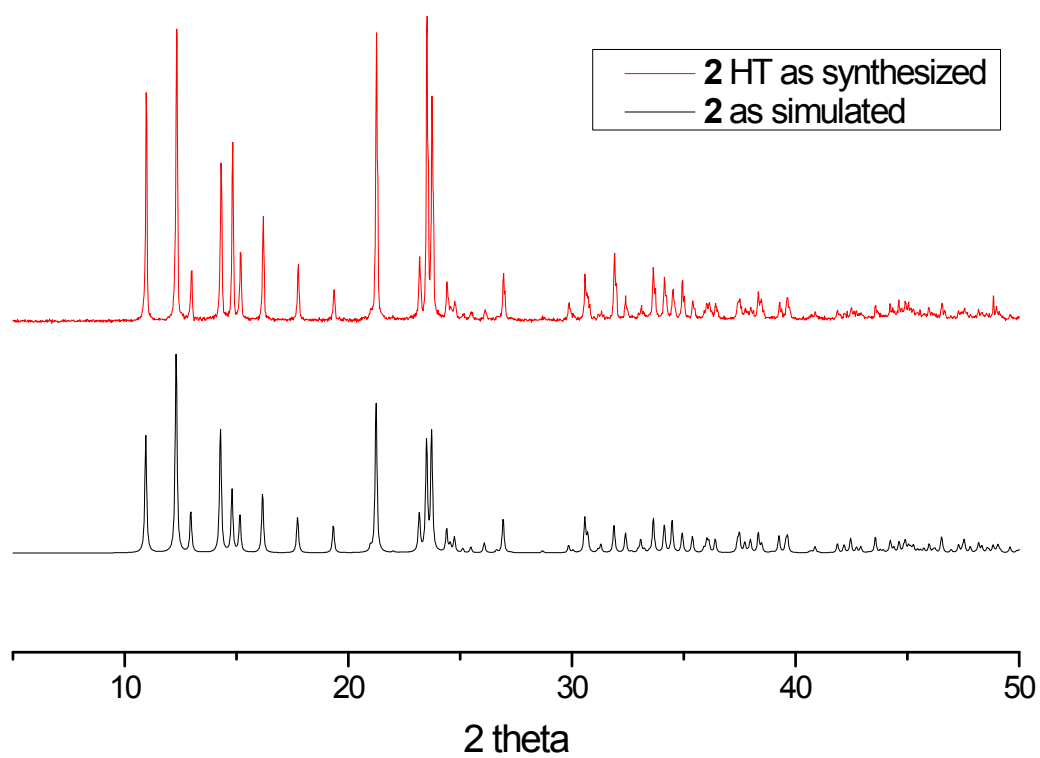

**Fig. S9** Simulated and experimental powder X-ray patterns for **3**.

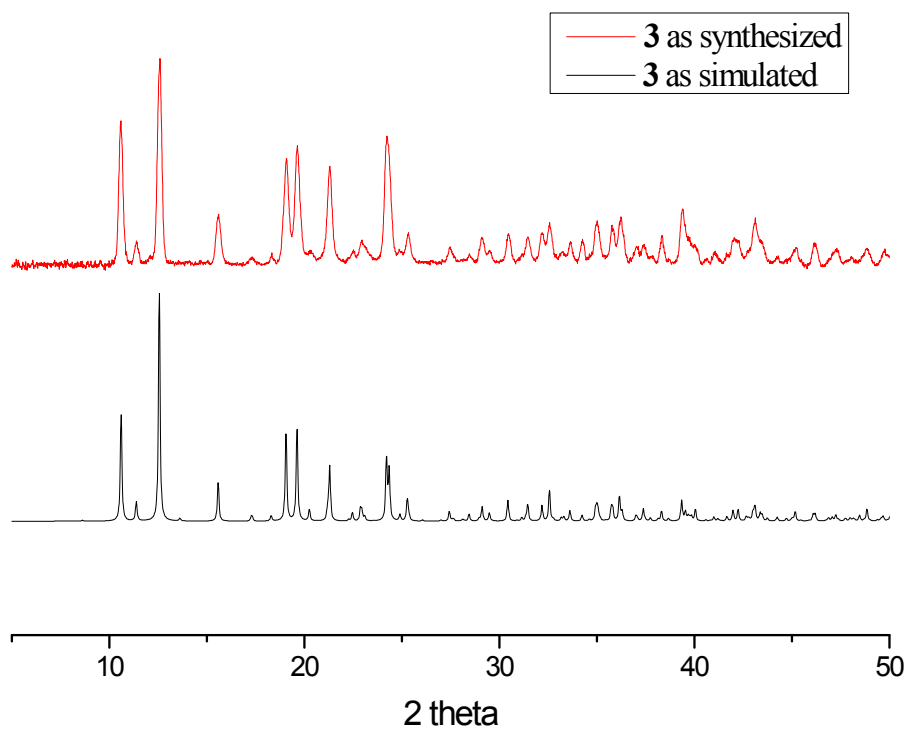

**Fig. S10** Simulated and experimental powder X-ray patterns for **4**.

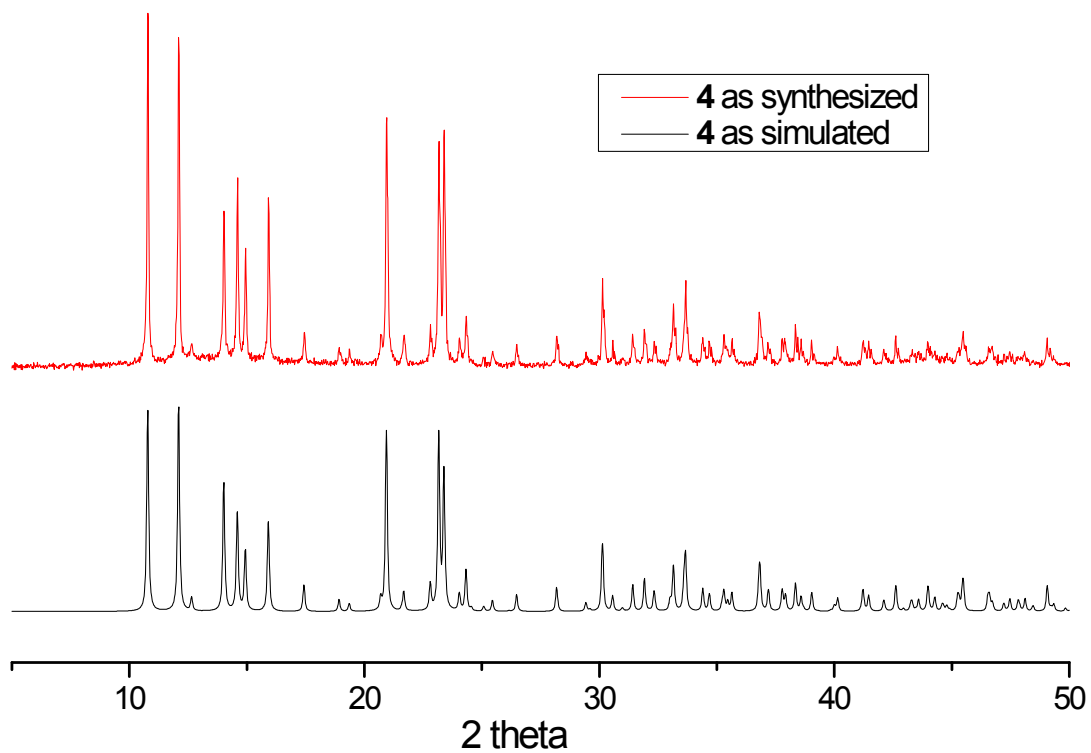

**Fig. S11** (a) Powder XRD pattern of **3** at variable temperature showing crystal to crystal transformation: (a) simulation of **3**, (b) RT, (c) 180 °C, (d) 190 °C, (e) 200 °C (f) 210 °C and (g) simulation of **4**. (b) Powder XRD patterns showing structural transformation from complex **1** to **2** under hydrothermal condition: (a) simulation of **1**, (b) **1** as synthesized, (c) **2** after hydrothermal and (d) simulation of **2**.

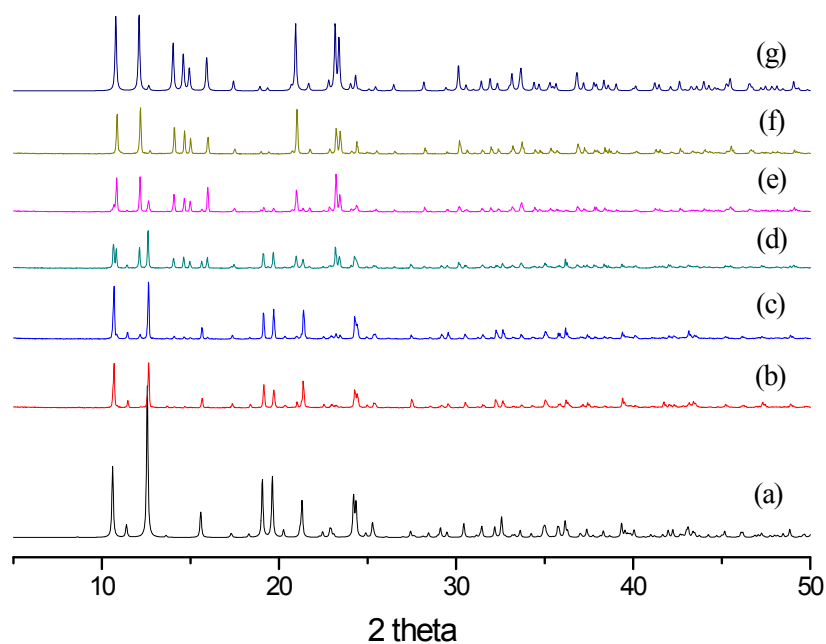

**(a)**

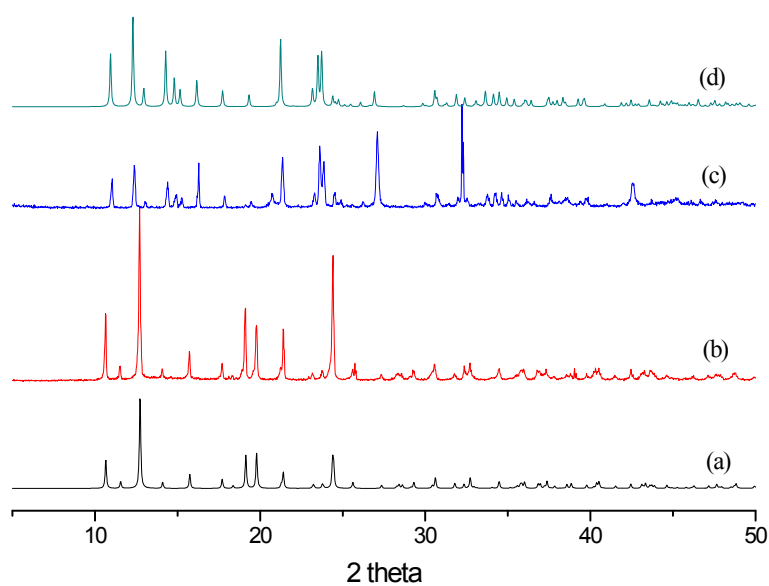

**(b)**

**Fig. S12** DSC thermogram of complex **1**.

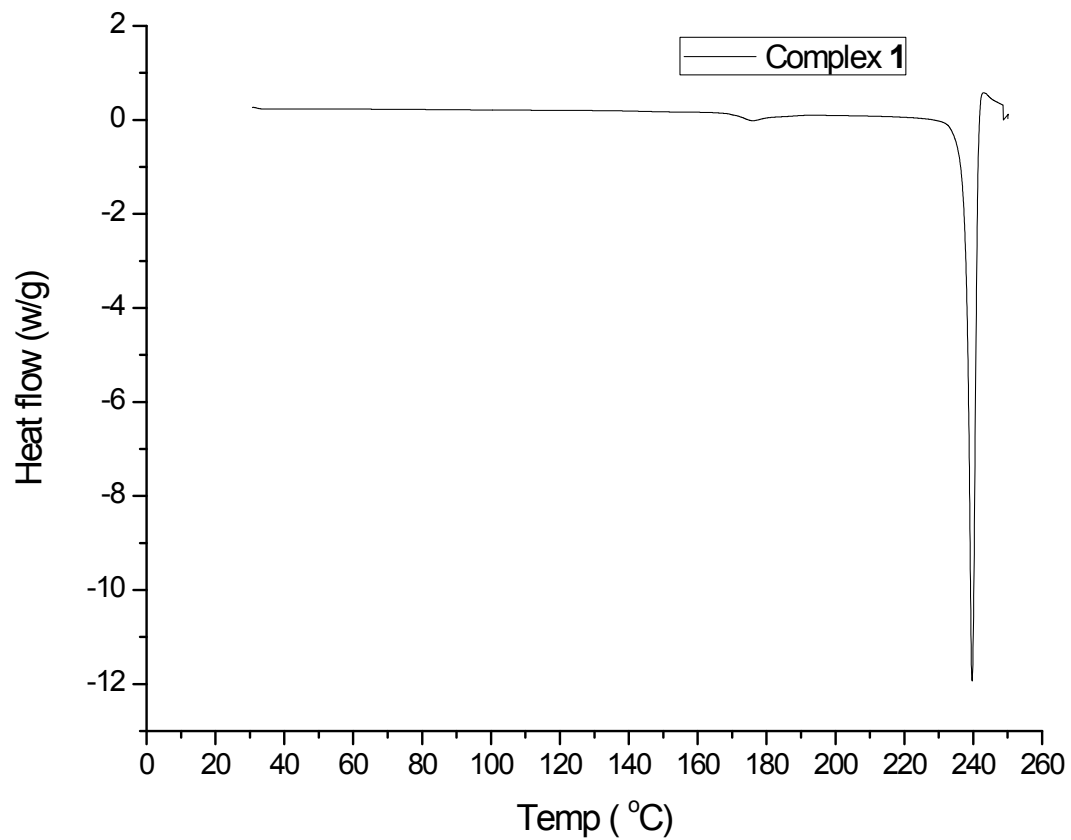

**Fig. S13** DSC thermogram of complex **2**.

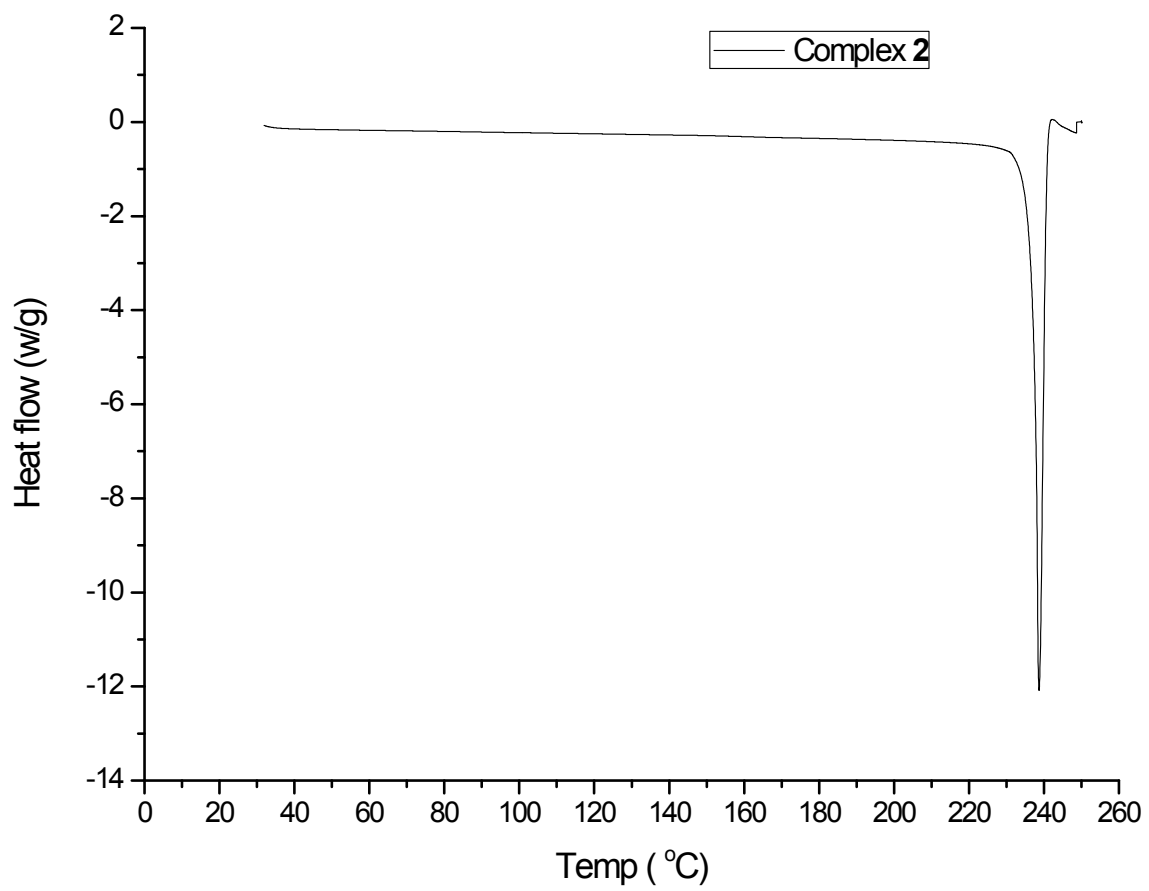

**Fig. S14** DSC thermogram of complex **3**.

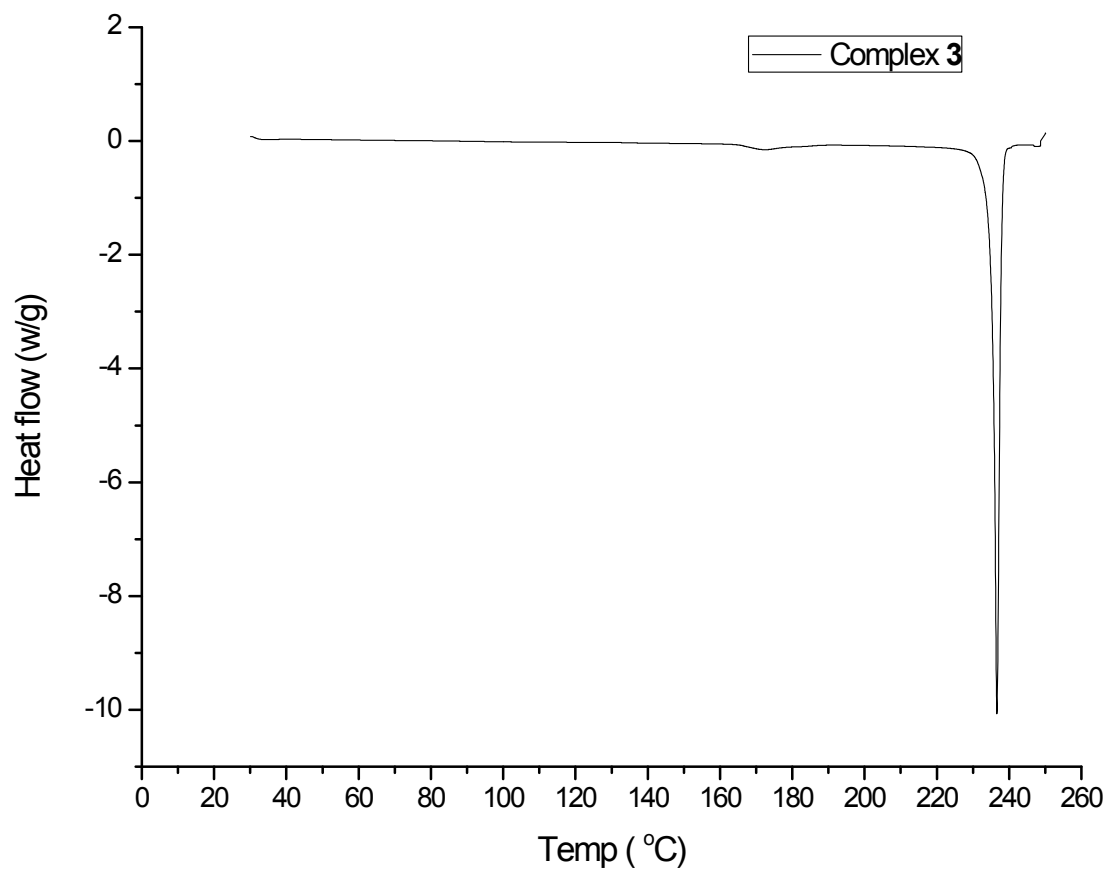

**Fig. S15** DSC thermogram of complex 4.

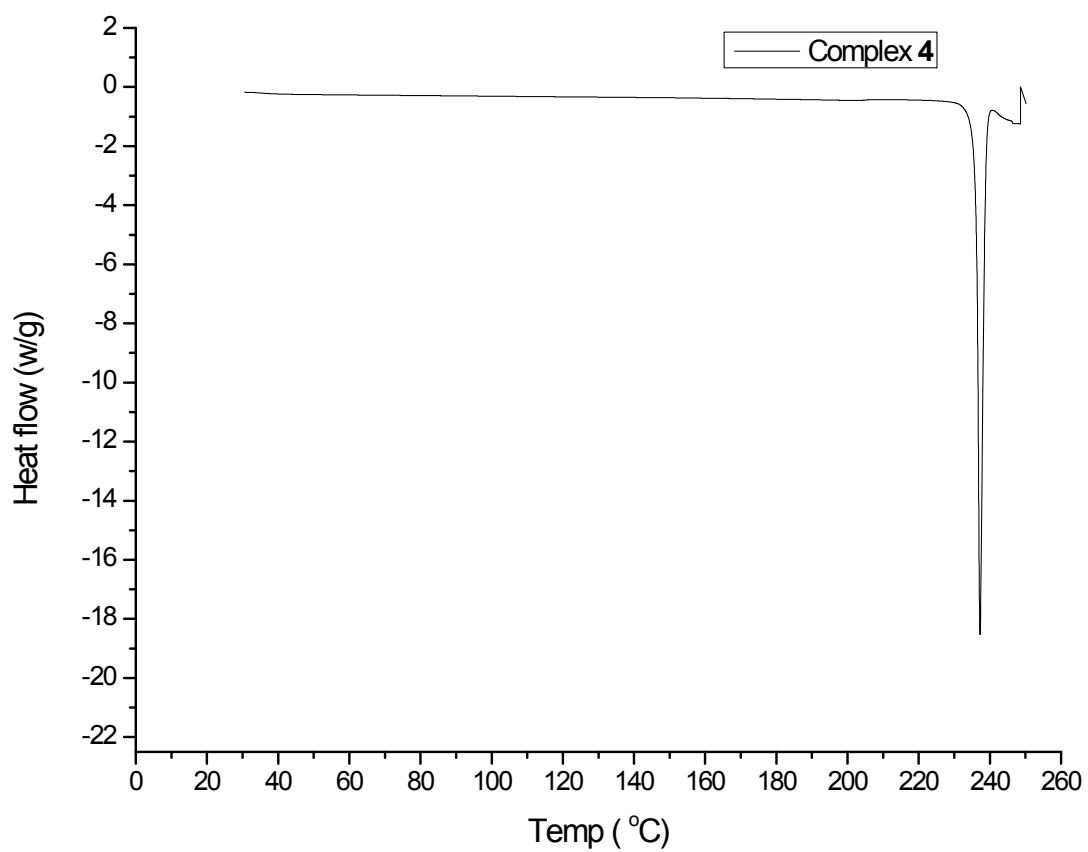



**Fig. S16** Solid state UV/Visible spectra of **1- 4**.

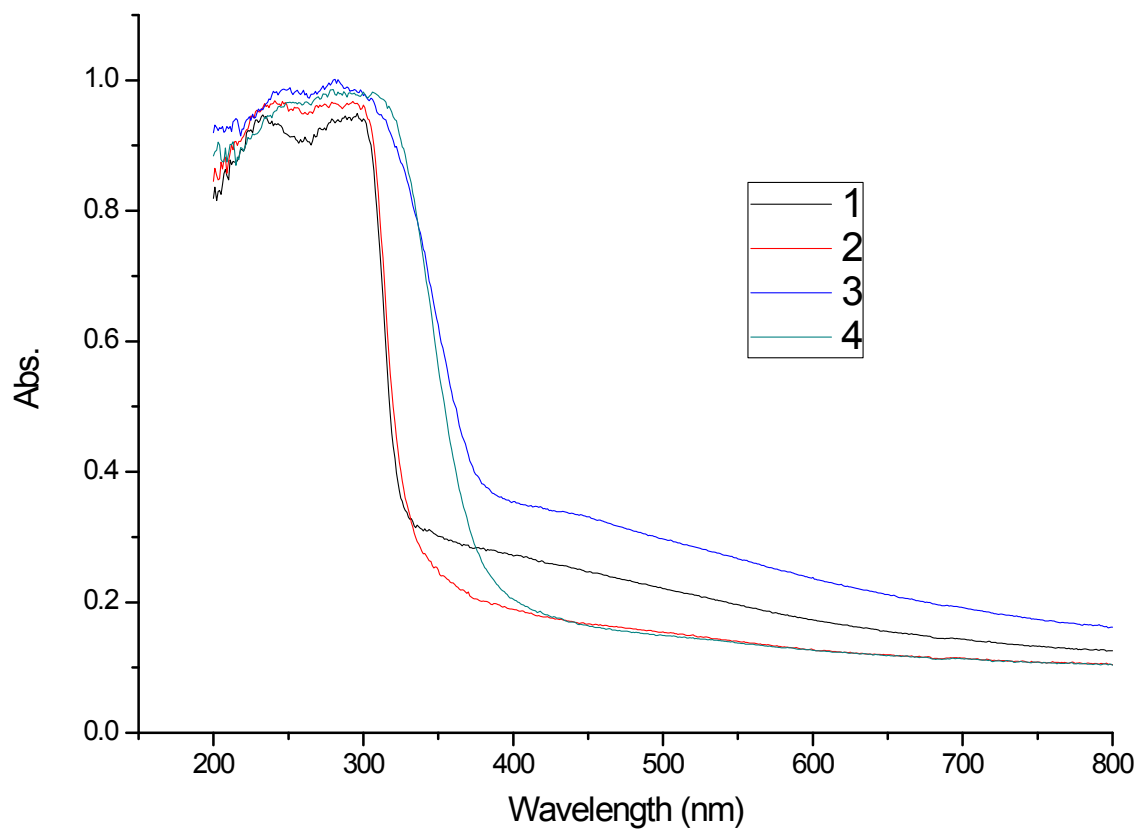

**Fig. S17** (a) Solid and (b) solution (0.5 mM in DMF and EtOH) emission/excitation spectra of **L** ligand.

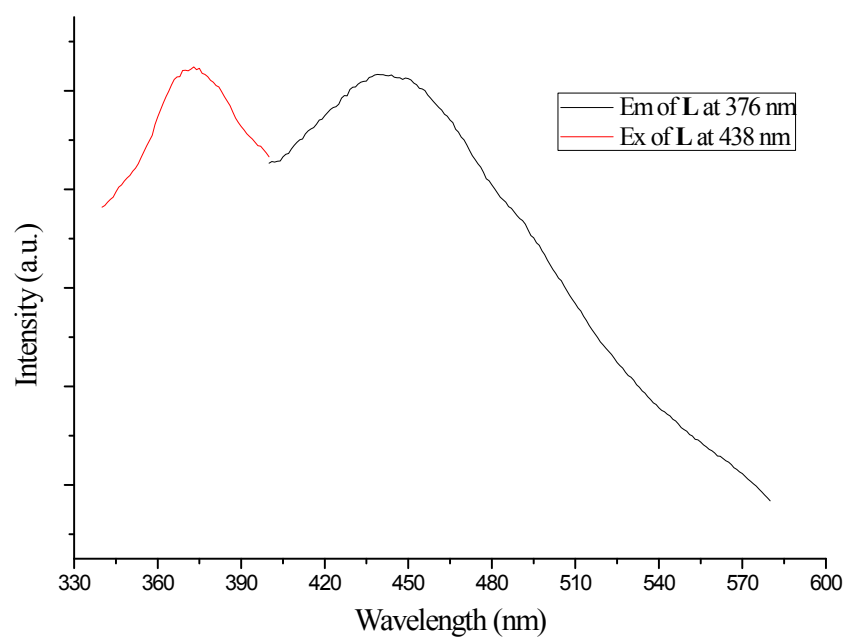

**(a)**

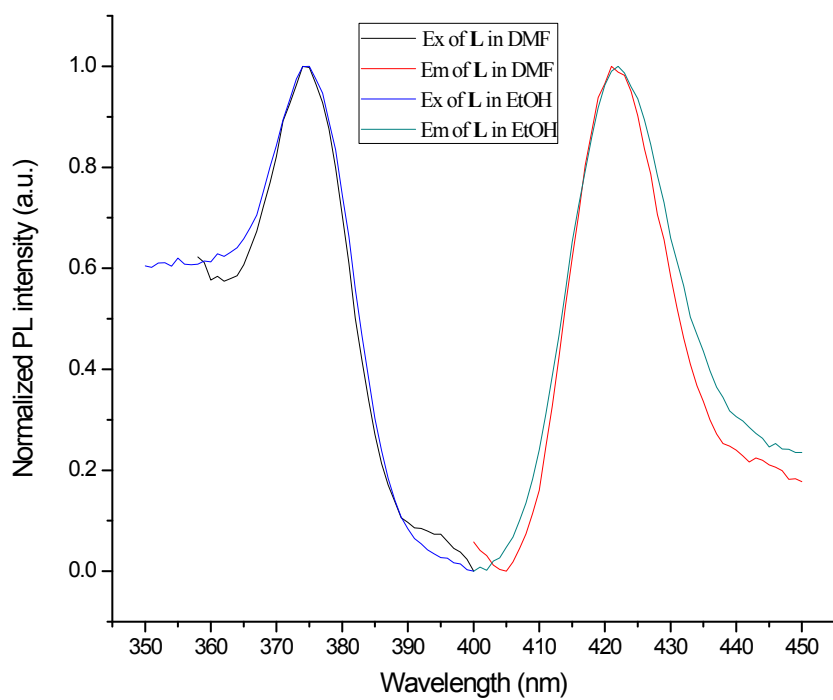

**(b)**

| Ligand   | Solvent | Ex (nm) | Em (nm) |
|----------|---------|---------|---------|
| <b>L</b> | DMF     | 374     | 421     |
| <b>L</b> | EtOH    | 375     | 422     |

**Fig. S18** Normalized emission spectra of **1-3** in the solid state.

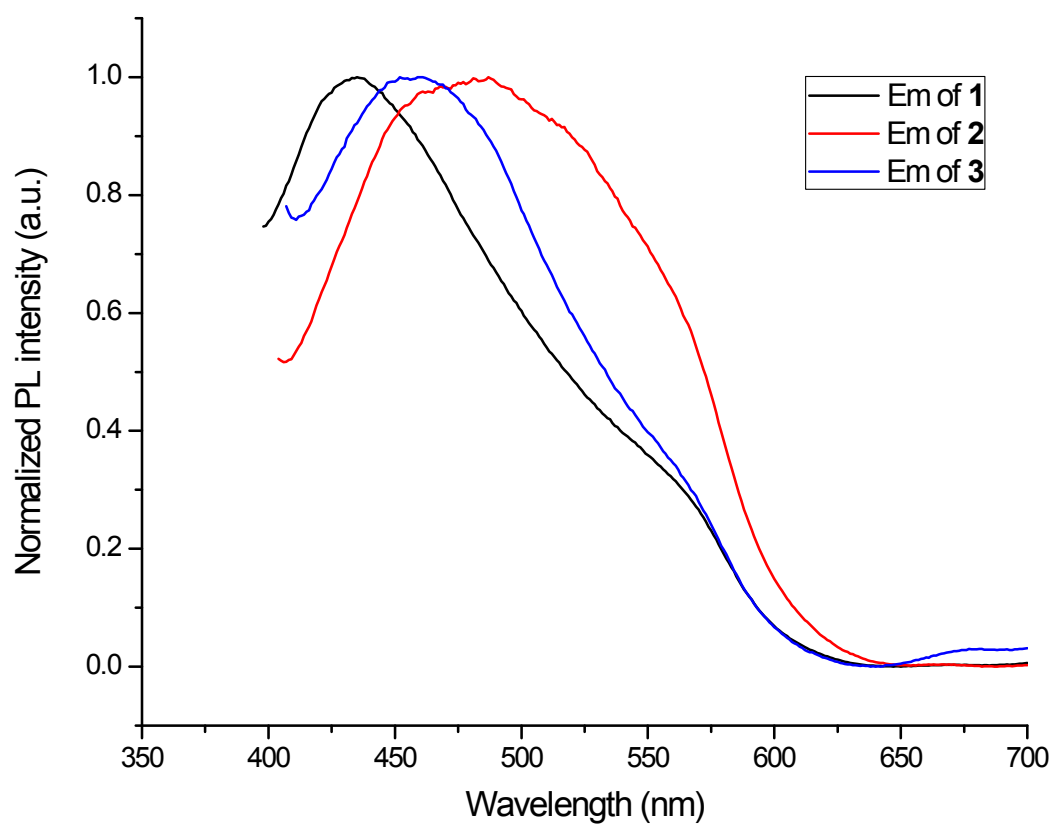

Supplement: c5ce01098e1.pdf [file c5ce01098e1.pdf]
